# Supplementary material for: Fabrication of a Plasmonic Nanoantenna Array Using Metal Deposition on Polymer Nanoimprinted Nanodots for an Enhanced Fluorescence Substrate
Source: MDPI journal article supplement (doi:10.3390/polym13010048), 2020-12-25
Supplement: s1 [file s1]

## [Supplementary Materials]

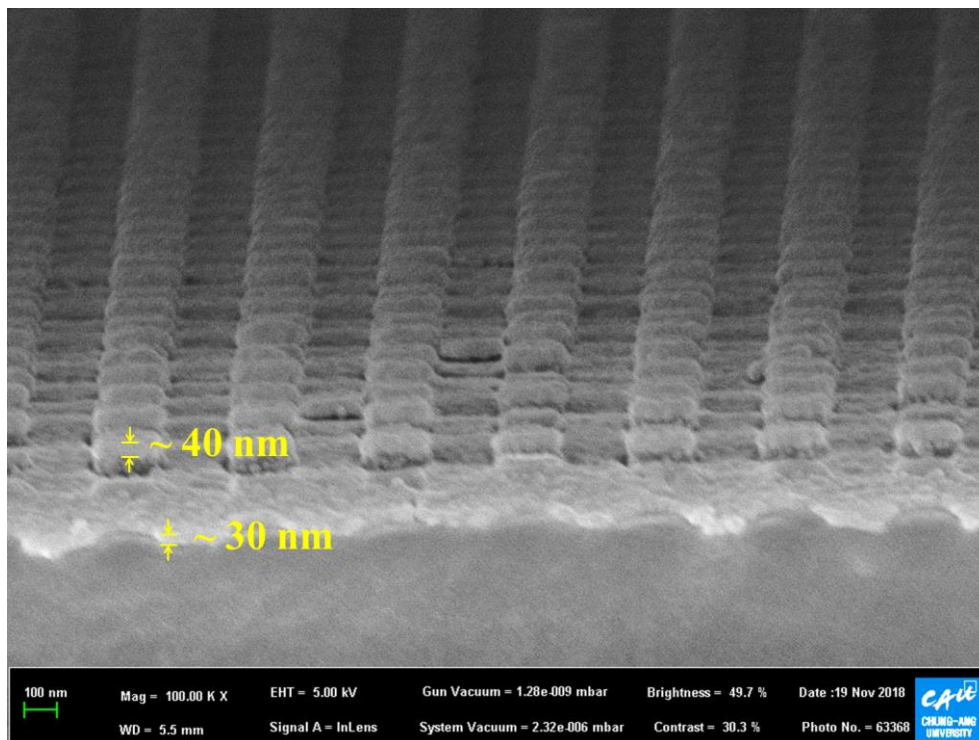

**Figure S1.** Enlarged cross-sectional SEM images of the fabricated plasmonic nanoantenna dot array MEF substrate with the target Ag thicknesses of 25 nm,

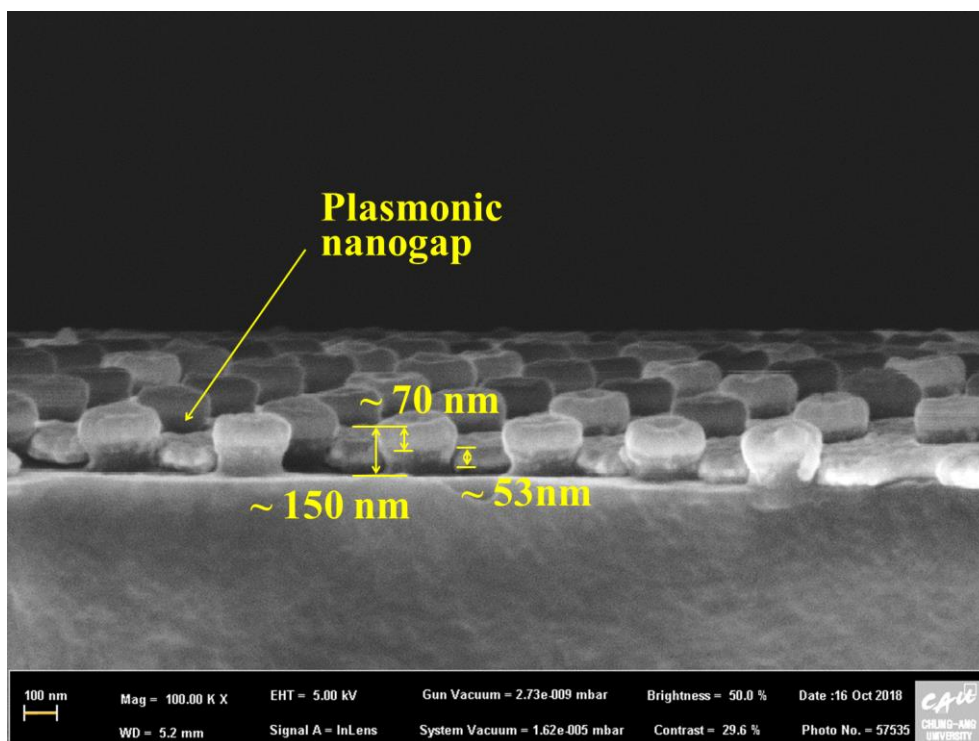

**Figure S2.** Enlarged cross-sectional SEM images of the fabricated plasmonic nanoantenna dot array MEF substrate with the target Ag thicknesses of 50 nm,

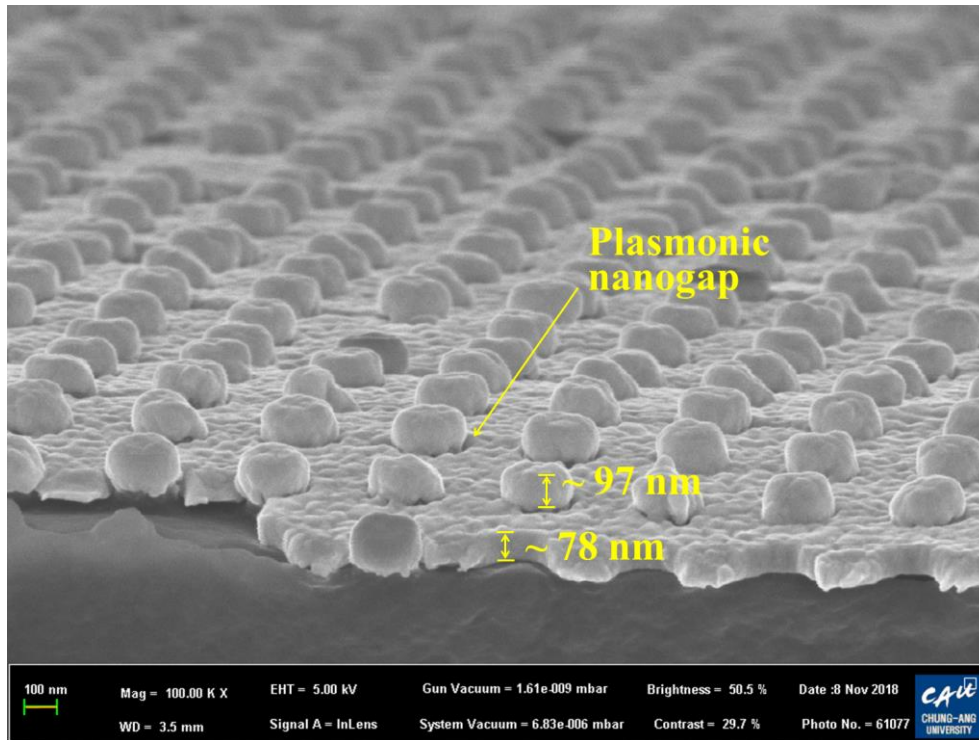

**Figure S3.** Enlarged cross-sectional SEM images of the fabricated plasmonic nanoantenna dot array MEF substrate with the target Ag thicknesses of 75 nm,

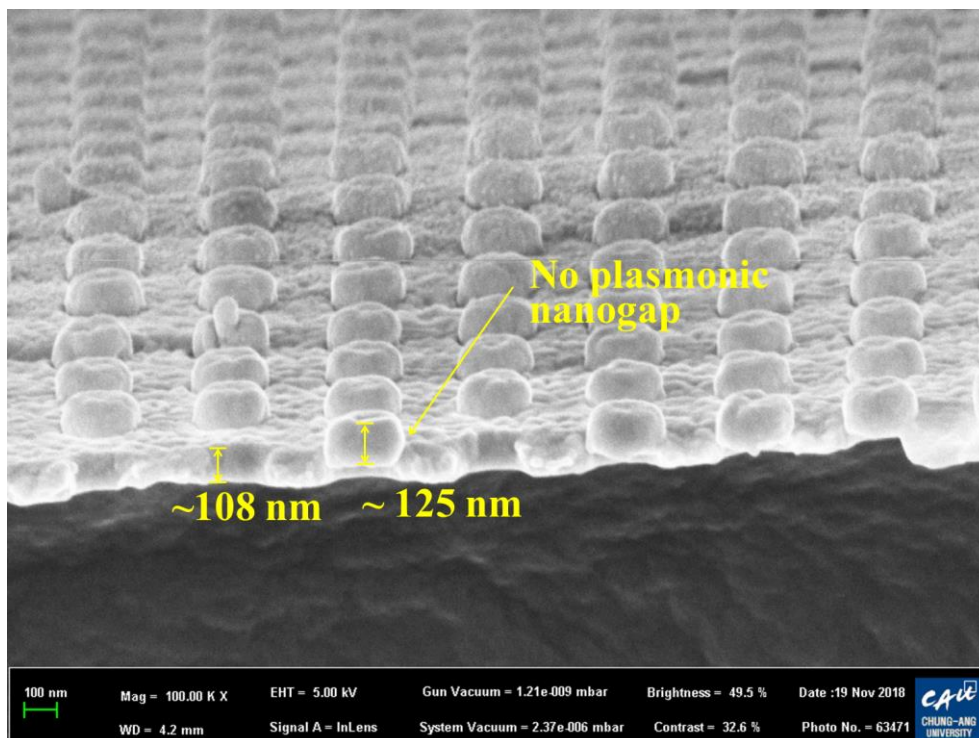

**Figure S4.** Enlarged cross-sectional SEM images of the fabricated plasmonic nanoantenna dot array MEF substrate with the target Ag thicknesses of 100 nm,
